# Using optically-pumped magnetometers to measure magnetoencephalographic signals in the human cerebellum

Chin-Hsuan Lin<sup>1</sup>, Tim M Tierney<sup>1</sup>, Niall Holmes<sup>2</sup>, Elena Boto<sup>2</sup>, James Leggett<sup>2</sup>, Sven Bestmann<sup>1</sup>, Richard Bowtell<sup>2</sup>, Matthew J Brookes<sup>2</sup>, R Chris Miall<sup>3</sup> & Gareth R Barnes<sup>1</sup>

1. Wellcome Centre for Human Neuroimaging, Institute of Neurology, University College London, 12 Queen Square, London, UK

2. Sir Peter Mansfield Imaging Centre, School of Physics and Astronomy, University of Nottingham, Nottingham, UK

3 School of Psychology, University of Birmingham, Birmingham, UK

## Abstract

We test the feasibility of an optically pumped magnetometer (OPM)-MEG system for the measurement of human cerebellar activity. We show that the OPM system allows for excellent coverage of this structure by decreasing the average sensor-to-cerebellum distance by around 33% (16mm), compared to a standard MEG helmet. This closer proximity to the cerebellum approximately doubles the signal-to-noise ratio (SNR). As a proof of principle, we used an air-puff stimulus to the eyeball in order to elicit cerebellar evoked and induced responses that are well characterized in non-human models. In three subjects, we observed an evoked component at 50ms post stimulus, which originates in the cerebellum (predominantly ipsilateral). This response was followed by a second component at 100ms post stimulus (predominantly contra-lateral). Sensory stimulation also elicited an event-related broadband spectral power change in the ipsilateral cerebellum at ~100ms in all subjects. We conclude that the OPM-MEG technology offers a promising way to advance the understanding of the information processing mechanisms in the human cerebellum.

## Introduction

Our understanding of cerebellar function has undergone a paradigm-shift in recent decades due to the studies of neuroanatomy (Glickstein, Sultan, & Voogd, 2011), neuropsychology (Schmahmann & Sherman, 1998), and functional magnetic resonance imaging (Buckner, 2013; Stoodley & Schmahmann, 2009). Until recently thought of as part of the motor system, accumulating evidence indicates that the cerebellum is essential for a variety of cognitive and social functions (Sokolov, Miall, & Ivry, 2017). Despite this expanding repertoire of cerebellar functions, there is a marked absence of human electrophysiological studies in this area.

In the domain of magnetoencephalography (MEG), less than 1% of publications have reported cerebellar activity (Dalal, Osipova, Bertrand, & Jerbi, 2013). A significant proportion of pioneer work described the cerebellum as one part of physiological (Gross et al., 2002; Jerbi et al., 2007; Muthukumaraswamy et al., 2006; Pollok et al., 2004, 2005; Tass et al., 2003) or pathological (Schnitzler et al., 2009; Timmermann et al., 2003) oscillatory networks, but there have been few subsequent detailed investigations in other domains. This is due to several factors. First, compared to the cerebral cortex, the cerebellar cortex is less favourable to the generation of a measurable MEG signal. This is because its densely folded anatomy causes a

1 high degree of field attenuation due to locally opposing current sources (Dalal et al., 2013;  
2 Hashimoto, Kimura, Tanosaki, Iguchi, & Sekihara, 2003; Tesche & Karhu, 1997). Second,  
3 cerebellar neurons are thought to have low firing synchrony based on the small amplitudes  
4 observed in local field potential studies (Gerloff, Altenmüller, & Dichgans, 1996). Third, the  
5 majority of the cerebellum is situated deep in the human cranium. The relatively large  
6 distance from the MEG sensors therefore makes it likely that cerebellar-generated MEG  
7 signals will be smaller than those measured due to current flow in the neocortex. Finally, yet  
8 importantly, current whole-head MEG systems were designed to target the cerebrum and  
9 provide poor coverage of the cerebellum (Ioannides 2005 and **Figure 2 A**). The issue is not  
10 exclusive to MEG – to date, few studies with scalp cerebellar EEG have been reported (Lascano  
11 et al., 2013; Muthukumaraswamy, Johnson, & Hamm, 2003; Todd, Govender, & Colebatch,  
12 2018). It is widely assumed that scalp EEG recordings for the cerebellum suffer from muscle  
13 artefacts (Muthukumaraswamy, 2013). Intracranial recordings in the cerebellum are also  
14 scarce because of their limited clinical indications (Dalal et al., 2013; Niedermeyer, 2004).  
15 These issues combined mean the electrophysiology of the human cerebellum is almost  
16 undocumented.

17 The development of optically pumped magnetometers (OPMs) provides a new opportunity  
18 to investigate cerebellar electrophysiology. OPMs are high sensitivity magnetic field sensors  
19 that can be flexibly placed on the scalp and do not need cryogenic cooling so that the sensor-  
20 to-brain distance can be significantly reduced. We have recently built such a wearable OPM-  
21 MEG system, placing the sensors close to the scalp by mounting them in a 3D printed scanner-  
22 cast (Boto et al., 2017, 2018). Currently, these sensors can be positioned in a dense array over  
23 a specific brain region of interest (Tierney et al 2018). This system is less susceptible to muscle  
24 artefacts compared to EEG (Boto et al., 2018). Moreover, the system is accommodated in a  
25 field-nulling apparatus (Holmes et al., 2018) which minimises field variation at the sensors  
26 due to head movement in the ambient field. These characteristics make OPM-MEG an ideal  
27 candidate for the study of cerebellar electrophysiology that is responsible for both motor and  
28 non-motor tasks.

29 As a proof-of-principle study, we recorded MEG data when non-noxious air-puffs to the eye  
30 trigger blinks. Air-puffs are the unconditioned stimuli (US) in a well-established cerebellar  
31 learning paradigm: eye-blink conditioning. The stimuli are known to elicit activity in the  
32 principal cells of the cerebellum, the Purkinje cells. These cells show “simple spike” responses  
33 driven by input from the brainstem pontine nuclei as well as “complex spike” responses to  
34 climbing fibres projecting from the inferior olive to bilateral, predominantly ipsilateral,  
35 cerebellar cortex, in untrained animals (Ohmae & Medina, 2015). Animals and humans  
36 present comparable behaviour, and apparently share similar circuitry and responses to  
37 physiological and pathological (lesion) interventions (see Freeman & Steinmetz, 2011 for a  
38 review of the system). Functional MRI studies in humans also accord well with corresponding  
39 electrophysiological studies in animals, with a prominent BOLD response in ipsilateral

1 cerebellar cortex (Cheng, Disterhoft, Power, Ellis, & Desmond, 2008; Dimitrova et al., 2002;  
2 Thurling et al., 2015).

3 We aim to demonstrate that air-puff driven neural signals in the cerebellum, which have been  
4 observed in both the invasive animal and non-invasive human literature, can be measured  
5 with OPM-MEG. We first show the scalp mounted OPM system reduces the sensor-to-  
6 cerebellum distance by one-third, which converts into an approximately two-fold increase of  
7 signals. We then present both evoked and induced responses measured with OPM-MEG in  
8 the cerebellum. Taken together, we show wearable OPM-MEG of the cerebellum provides a  
9 promising future to examine the cerebellum during human cognition and action, and  
10 pathological conditions linked to cerebellar dysfunction.

## 11 **Materials and methods:**

12 This section is divided into three parts. First, we describe the OPM-MEG system. Second, we  
13 summarise the experimental procedures for cerebellar activity measurement. Finally, we  
14 introduce the inversion scheme used to localise the source activity.

### 15 **Participants**

16 Three healthy subjects (1 female, 2 male) aged 27-50, with no history of psychiatric or  
17 neurological diseases, participated in the study. All subjects were naïve to the eye-blink  
18 conditioning. The research protocol was approved by the University of Nottingham Medical  
19 School Research Ethics Committee and the University of Birmingham Research Ethics  
20 Committee. Written informed consent was obtained from all participants. The experiments  
21 took place at the University of Nottingham.

### 22 **OPM-MEG System**

23 The OPM-MEG system has been previously described in detail (Boto et al., 2017, 2018;  
24 Holmes et al., 2018; Tierney et al., 2018). Briefly, the system consists of an OPM sensor array  
25 within a customised scanner-cast, and a field-nulling apparatus comprising four reference  
26 OPM sensors and field-nulling coils (**Figure 1**).

### 27 *Optically-pumped magnetometer (OPM)*

28 The OPM sensor used here (QuSpin Inc., Louisville, CO, USA) is an integrated unit with a noise  
29 level of  $\sim 15$  fT/√Hz in the 1-100 Hz band, and a dynamic range of  $\pm 1.5$  nT (for details see (V.  
30 K. Shah & Wakai, 2013; V. Shah, Osborne, Orton, & Alem, 2018)). Each OPM sensor head  
31 contains a  $3 \times 3 \times 3$  mm<sup>3</sup> cell containing a <sup>87</sup>Rb vapour, with a 795 nm semiconductor laser  
32 beam passing through the cell to pump the atoms to a magnetically sensitive state, and a  
33 silicon photodiode. A zero-field resonance is then used to detect the weak biomagnetic fields  
34 (Dupont-Roc, Haroche, & Cohen-Tannoudji, 1969). In brief, at zero field the gas is transparent  
35 to the laser light and there is maximal signal at the photodiode. Perturbations from zero field  
36 cause laser light to be absorbed by the gas (as the atoms have changed energy state) this

1 changes the transparency of the cell to the laser light, resulting in less signal at the  
2 photodiode.

### 3 *Field nulling apparatus*

4 The Earth's residual static field in the Nottingham magnetically shielded room is ~25nT with  
5 a maximal gradient of approximately 10 nT/m. This means that even minimal head  
6 movements (e.g. a 4 degree rotation) can easily generate signals which exceed the OPM's  
7 dynamic range. In order to mitigate these effects we used a set of bi-planar coils to generate  
8 magnetic fields which counteract the remaining static field as measured by four reference  
9 sensors close to the head. By applying this method, the dominant component of the static  
10 field and field gradient can be diminished by factors of 46 and 13 respectively, in a volume of  
11  $40 \times 40 \times 40 \text{ cm}^3$  encapsulating the head (Boto et al., 2018; Holmes et al., 2018).

### 12 *Scanner-cast design*

13 Data from an anatomical T1-weighted MRI scan was used to generate a 3D mesh representing  
14 the outer surface of each participant's scalp. This 3D mesh was used in 3D printing to shape  
15 the inner surface of a nylon head-cast, as described in (Boto et al., 2017; Meyer et al., 2017;  
16 Tierney et al., 2018), with sockets around the outer surface to hold the OPM sensors.  
17 Importantly, the mesh and subsequently produced scanner-cast provide accurate socket and  
18 thus sensor positions and orientations, which are in the same coordinate space of as the MRI  
19 image. Therefore, no coregistration is needed and the sensor positions are defined as the  
20 centre of the socket bases with a 6.5 mm offset, which takes into account that the sensitive  
21 portion of the OPM not being precisely at the base of the sensor. Here, with limited sensors  
22 available, we placed the sensors proximal to the cerebellar and somatosensory cortices.  
23 **Figure 1** shows the sensor configuration in a typical subject. Across the 3 participants thirteen  
24 to nineteen posterior sensors and four to six somatosensory sensors were used. Additionally,  
25 two sensors were placed in bilateral infra-orbital slots for eyeblink detection (**Figure 1.A**).

### 26 Experiment: Eyeblink paradigm

27 Eyeblinks were elicited by a 32 ms air-puff delivered through a nozzle mounted on the  
28 scanner-cast (**Figure 1.A**); essentially a pressurised air cylinder (1 Bar) fed into a 10 m semi-  
29 rigid plastic tube (2mm internal diameter), under the control of a bespoke pneumatic valve  
30 controller. Some details of the pneumatic delivery system are given in Leonardelli et al.,  
31 (2015). The nozzle directed the air-puff to the outer canthus of the left eye from a distance of  
32 approximately 2-4 cm, individually adjusted to evoke a visible blink after each delivery, but  
33 without discomfort. The arrival time of the air-puff was calibrated off-line using a microphone  
34 and was relatively insensitive to distance of the nozzle over a limited range (~1 ms/cm).  
35 Subjects received four contiguous 12-minute blocks of stimulation. To equate the task to the  
36 baseline phase of a previously validated eyeblink conditioning paradigm (Cheng et al., 2008),  
37 each block constituted 200 trials: 140 trials of air-puffs, 50 trials of a 550-ms binaural tone  
38 (2800 Hz), and 10 paired trials with the tone co-terminated with air-puff delivery; trial order  
39 was randomized in sets of 20. A total of 600 air-puff trials were recorded per subject. Every

1 trial began with a random wait of 1-2.5 seconds to avoid habituation to puffs; inter-stimulus  
2 intervals averaged to 3.6 s.

### 3 MEG data collection

4 The OPM data were digitized at a sampling rate of 1200 Hz, using a 16-bit digital acquisition  
5 (DAQ) system (National Instruments, Austin, TX) controlled by custom-written software in  
6 LabVIEW.

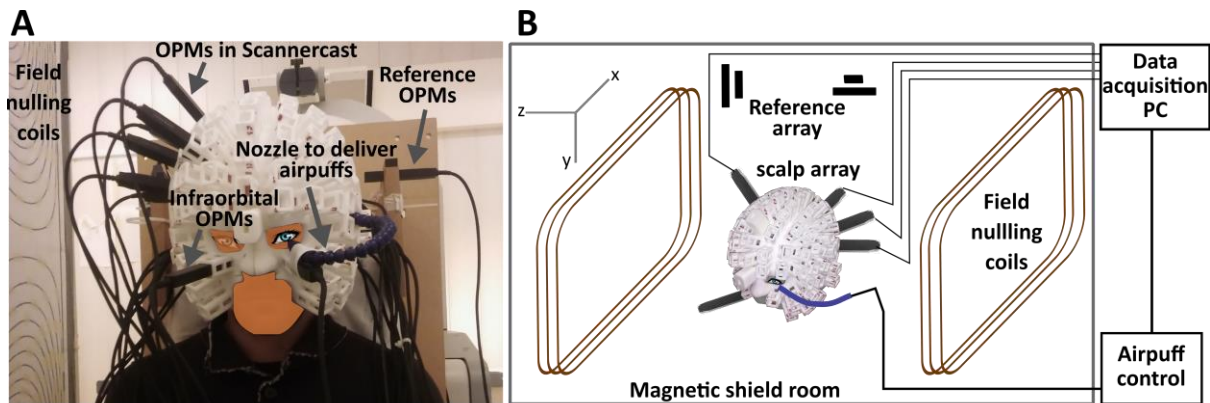

7  
8 **Figure 1. Experimental set-up (A) and schematic illustration (B) of the air-puff paradigm for**  
9 **cerebellar activity measurement.** The participant is seated inside a magnetically shielded  
10 room (MSR) wearing a customised scanner-cast. Air-puffs are delivered to the outer canthus  
11 of the participant's left eye via a nozzle. OPM sensors are inserted into slots covering the  
12 cerebellum and right somatosensory cortex. Two more sensors are placed in bilateral infra-  
13 orbital slots to measure eyeblinks. Field-nulling coils stand either side of the participant  
14 carrying currents set so as to minimize the residual magnetic field in the MSR, which is  
15 measured by 4 reference OPMs prior to scanning. The task-controlling laptop, located outside  
16 the MSR, sends synchronizing triggers that were recorded by the data acquisition PC during  
17 scanning.

### 18 MEG data analysis

#### 19 Pre-processing

20  
21 Data were filtered between 5 and 80 Hz (or 0 and 200 Hz for eye-blink analysis; see  
22 Supplementary Material) and each trial epoched between -200 and +500 ms relative to air-  
23 puff onset. Because OPMs are configured as magnetometers (as distinct from gradiometers  
24 which are used in many cryogenic MEG systems) they are susceptible to increased  
25 environmental interference. We mitigated interference by constructing virtual gradiometers,  
26 which linearly regress the signal recorded by the reference array from the signal recorded at  
27 the scalp array (Boto et al., 2017). Thereafter, data were concatenated across 4 blocks and all  
28 600 trials of data were ranked according to signal variance. Trials with variances higher than  
29 [median + 3x median absolute deviation] were rejected (Leys, Ley, Klein, Bernard, & Licata,

1 2013). For the evoked response analysis, the remaining trials (548, 588 and 585 trials with air-  
2 puff stimulation, for subject 1, 2, and 3 respectively) were baseline corrected to the mean of  
3 the window 50 ms prior to stimulus onset and then averaged.

4 For spectral power changes, single trial time-frequency (TF) decompositions in sensor space  
5 were calculated for each subject using a Morlet wavelet transform (Tallon-Baudry et al 1998)  
6 and then averaged across trials. The wavelet transform was calculated for each time-point  
7 between -150 and 450 ms, with 76 scale bins corresponding to frequencies between 5 and 80  
8 Hz. For each trial and frequency, the mean power of the interval from 50 ms before stimulus  
9 onset until stimulus presentation was considered as a baseline level. The power change in  
10 each frequency band post-stimulus was expressed as the relative percentage change from the  
11 pre-stimulus baseline. We additionally calculated the correlations between the latencies of  
12 induced power changes and blinks across trials using Pearson's r-values (Yuval-Greenberg et  
13 al. 2008): for all trials, the latency of the maximal peak of 5-80 Hz TF data at the time window  
14 of 0-350 ms was computed and correlated with the latency of the blink peak (as estimated by  
15 the time of the peak amplitude for each trial, examples can be seen in **Supplementary Figure**  
16 **2.B.**) at the same time window. All of the data analysis was performed using SPM12 within  
17 the MATLAB environment (Release 2014a, Mathworks Inc., Natick, MA).

### 18 *MEG source localisation*

19 We evaluated both the average evoked response using a dipole fit analysis and the average  
20 spectral power change using a beamformer. In both cases the volume conductor model was  
21 the Nolte single shell model (Nolte, 2003), implemented in SPM12, using the inner-skull  
22 boundary from the individual T1-weighted MRI.

### 23 *Dipole fitting*

24 We reconstructed sources of the evoked field data for each subject using the SPM  
25 implementation of variational Bayesian for equivalent current dipole fitting (Kiebel,  
26 Daunizeau, Phillips, & Friston, 2008). In brief, the Bayesian inversion scheme assigned prior  
27 means and variances of dipole positions and moments. The posterior dipole locations and  
28 moments were estimated by maximising the model evidence (as approximated by negative  
29 Free energy (Friston, Mattout, Trujillo-Barreto, Ashburner, & Penny, 2007)) for the data, given  
30 the model parameters. The advantage of using the Bayesian formalism is that it allows us to  
31 test a straightforward set of hypotheses by comparing models in which the sources have  
32 different prior locations. We specified the prior mean locations of 4 single dipole models  
33 based on the literature (Cheng et al., 2008; Nevalainen, Ramstad, Isotalo, Haapanen, &  
34 Lauronen, 2006): (1) right somatosensory cortex (S1, face area), (2) left S1 (face), (3) right  
35 cerebellum (in lobule VI) and (4) left cerebellum (lobule VI). Two additional priors in the right  
36 and left primary visual cortex (proximal to the cerebellum) were also tested (models 5 and 6).  
37 The standard deviation of each prior dipole location was set to 10 mm. The mean and  
38 standard deviation of each prior moment were assigned as 0 and 10 nA·m. To avoid local  
39 maxima, 50 iterations, with starting locations and orientations randomly sampled from prior



1 distributions (i.e. the means and standard deviations of prior locations and moments), were carried  
2 out for each model in each subject (50 x 6 = 300 iterations in each subject). For each subject  
3 we used the model parameters corresponding to the highest free energy value across all  
4 iterations. The maximal free energy values across subjects were then averaged.

### 5 *Beamforming*

6 We used the scalar version of a linear constrained minimum variance beamformer algorithm  
7 implemented in the DAiSS toolbox for SPM (<https://github.com/spm/DAiSS>) to localise the  
8 source of maximal spectral power change over the brain volume. We used a covariance  
9 window of 5 to 80 Hz and -50 to +125 ms and contrasted the 75 to 125 ms post-stimulus  
10 period with a pre-stimulus period between -50 and 0 ms. The regularization rate  $\lambda$  was set to  
11 be 0 (i.e. unregularized). The source orientation was set in the direction of maximal power.  
12 The reconstruction grid spacing was 2 mm. We bootstrapped the analysis in order to find a  
13 confidence volume on the global peak estimate by randomly resampling trials with  
14 replacement and producing 50 peak estimates per subject.

## 15 **Results**

16 We first compared the spatial distribution of the OPM sensors around the cerebellum to a  
17 standard cryogenic (CTF) MEG system (**Figure 2**) for a typical subject (Subject 2). The cryogenic  
18 MEG sensor positions were obtained from another study during which subject 2 underwent  
19 conventional MEG scanning (Meyer et al., 2017). It is clear that the coverage of the cryogenic  
20 MEG system is sub-optimal for cerebellum (**Figure 2.A**). To provide a fair comparison of the  
21 18 OPM cerebellar sensors, only the nearest 18 SQUID sensors were taken into account. The  
22 average sensor-to-cerebellum distance decreased from 49 mm in the SQUID MEG to 33 mm  
23 in the OPM-MEG (**Figure 2.B**). This change in distance (factor 1.48) translates into an  
24 approximate doubling of the signal magnitude measured by the OPM array, when compared  
25 to SQUID sensors. Bespoke scanner-casts could further optimise the placing of sensors for  
26 cerebellar recording, by adding another row of sockets below the lowest currently available.  
27

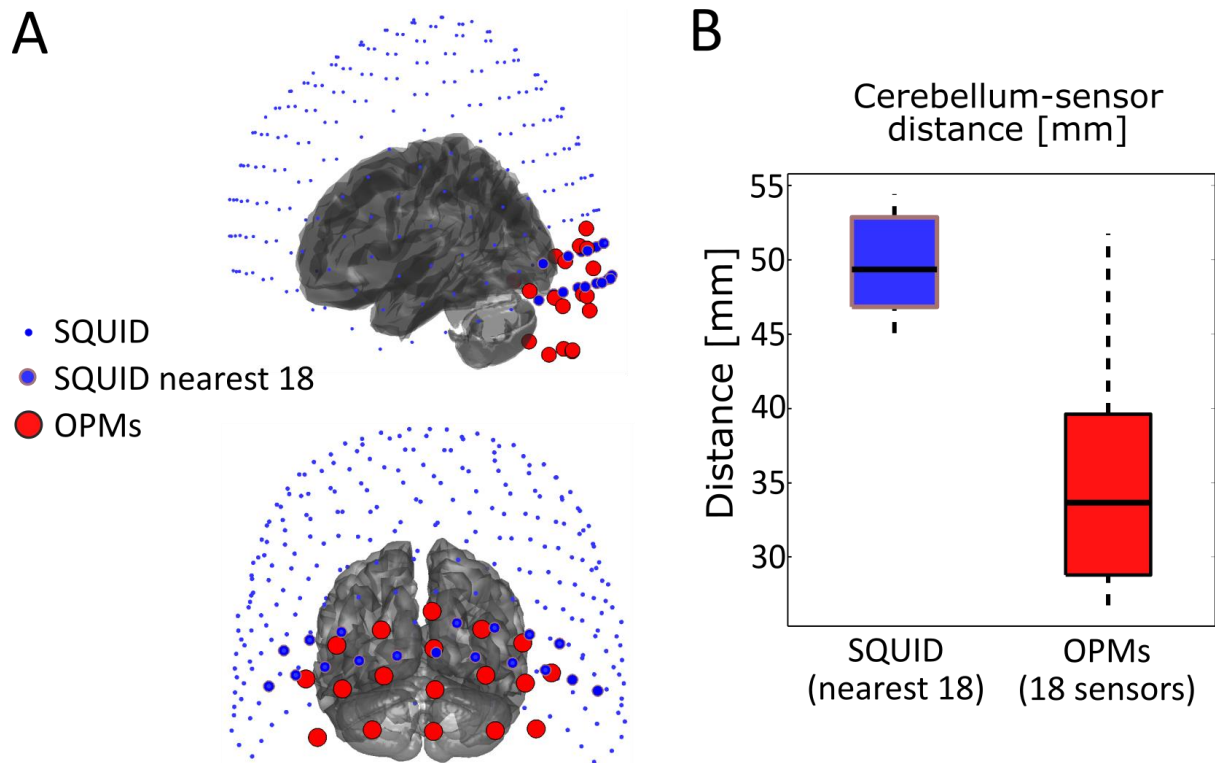

1

2 **Figure 2. Comparison of the sensor to cerebellum distance for OPM-MEG and SQUID-MEG.**  
3 **(A)** The sensor array positions with respect to the brain surface in one subject (subject 2): blue  
4 circles: a CTF MEG system with SQUID-based axial gradiometers (VSM MedTech, Vancouver,  
5 Canada) and red circles: an OPM sensor array fixed on the scanner-cast. **(B)** Average sensor-  
6 to-cerebellum distance (averaged across nearest 18 sensors) reduced by one-third, from 49  
7 mm (SQUID) to 33 mm (OPMs).



## A cerebellar sensors

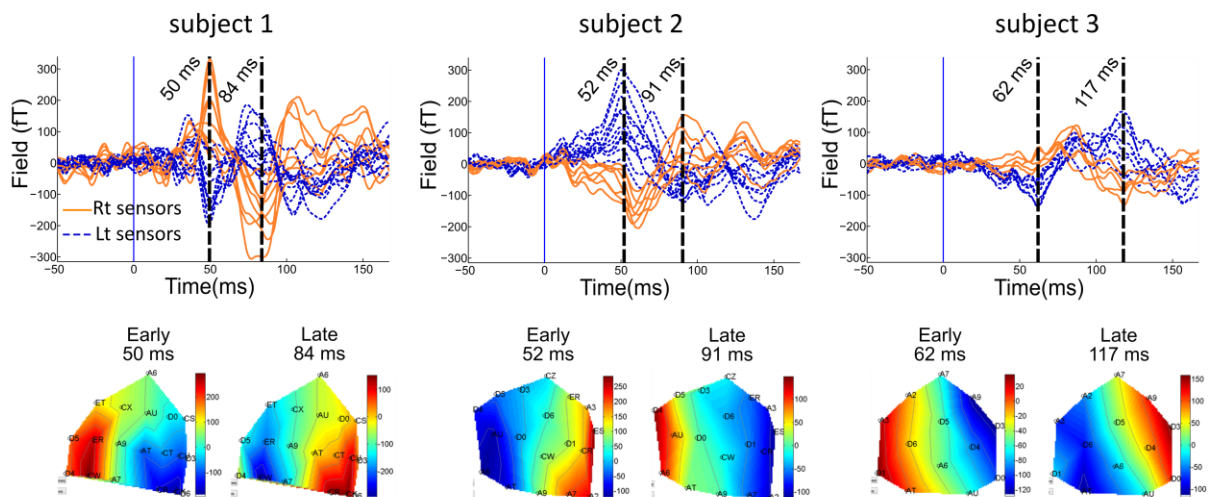

## B somatosensory sensors

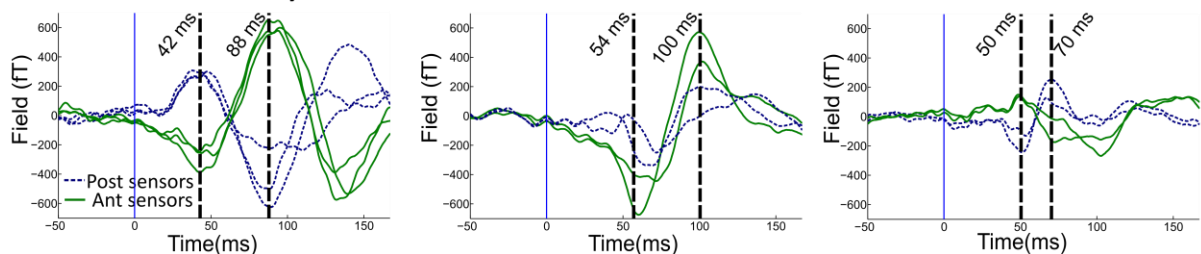

1  
2 **Figure 3 Sensor-level evoked responses following air-puff stimulation. (A)** Upper panel: air-  
3 puff evoked responses over the cerebellum for 3 subjects. Each trace corresponds to the  
4 average signal for one sensor over the posterior cranium, situated left (blue dashed lines) and  
5 right (orange solid lines) of the midline respectively. Lower panel: field maps of the evoked  
6 field at the latencies of the two distinct peaks; note different sensor layout for each subject.  
7 **(B)** Sensor-level evoked responses over the right contra-lateral somatosensory area (anterior  
8 and posterior sensors as green-solid and blue dotted curves respectively).

9 We next looked at the average evoked response to air-puff stimulation on the cerebellar OPM  
10 sensors and the sensors positioned over the contra-lateral somatosensory cortex. **Figure 3.A**  
11 shows the average evoked response in posterior sensors (left sensors: blue dotted, right  
12 sensors: orange solid) for the three subjects. Two main peaks were observed across subjects  
13 at around 50-60 ms and 85-115 ms. The field patterns observed at these peaks were  
14 qualitatively dipolar (**Figure 3.A** lower panel). There was a slight latency difference (approx. 2  
15 ms on average) between positive and negative going extrema (e.g. Subject 2, **Figure 3.A**  
16 upper panel), indicating a more complex source distribution. We also observed two response  
17 peaks from sensors proximal to the primary somatosensory cortex (anterior sensors: green  
18 solid, posterior: blue dotted, **Figure 3.B**). For each subject, the earliest distinct somatosensory  
19 evoked response peaked at 40-50 ms post-stimulus, compatible with the p45m response to  
20 facial tactile stimuli (Nevalainen et al., 2006).

21 We also looked for event related spectral changes in the cerebellar sensors. **Figure 4** shows  
22 the average time-frequency spectrograms (in percentage change of power) for the sensor

1 with the largest power change in each subject. Increased broadband activity, peaking at ~100  
2 ms post puff contact can be seen in all three subjects. The peak correlation between the  
3 latencies of the maximal power changes and blinks, across trials, was significant ( $p < 0.001$  in  
4 all cases) although weak (R Square = 0.02, 0.02, 0.03 for the three subjects, also see  
5 **Supplementary Figure 2**).

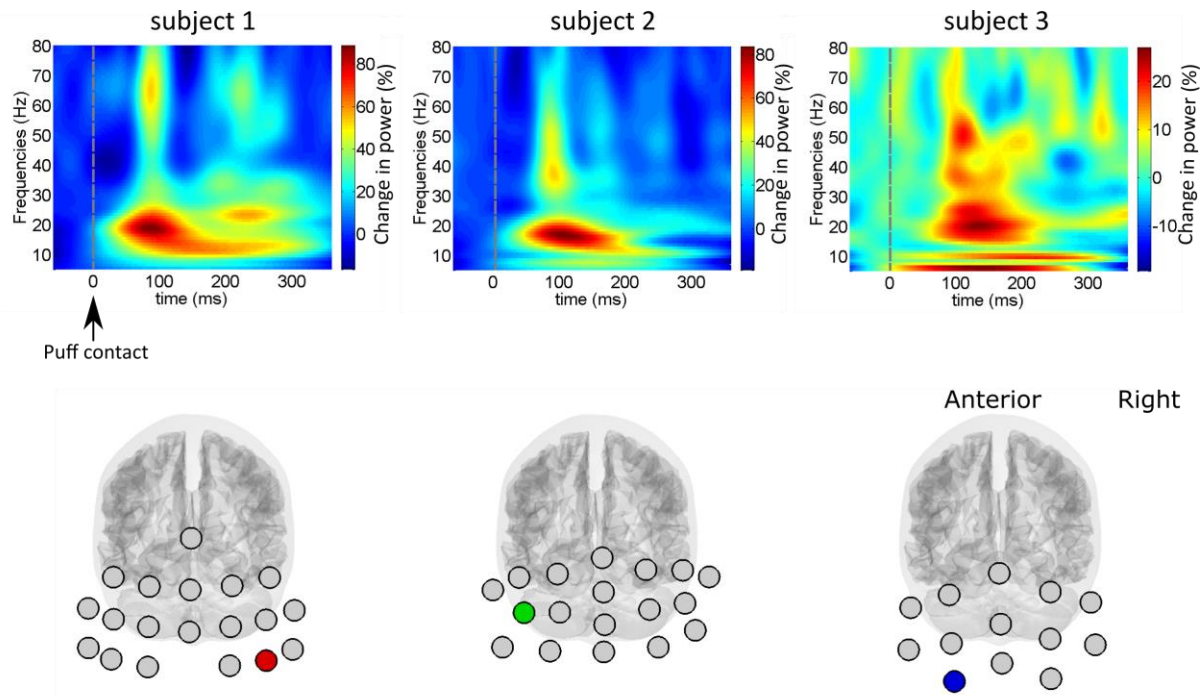

6

7 **Figure 4** Time-frequency spectrograms showing event related spectral changes to air-puff  
8 stimulation. Each panel is each subject's average across all trials at the sensor with the  
9 maximal power change. The positions of these sensors are marked as coloured circles for each  
10 subject and mapped onto the MNI template brain (lower panel).

11 Source reconstruction

12 **Figure 5** shows the source reconstruction results of early and late evoked responses. **Figure**  
13 **5.A** compares the free energy values for the early response (50-60ms; top panel) and late  
14 responses (85-115ms, bottom panel) for six models with different source location priors,  
15 averaged across subjects. Both cerebellar priors are significantly better than the other models  
16 ( $\Delta F > 3$ , as F approximates the log likelihood, a positive difference of 3 means the preferable  
17 model is about twenty times more likely). The left (ipsilateral) cerebellum lobule VI had the  
18 highest model evidence for both peaks; although this model was not significantly better than  
19 the model of a source in the right cerebellum ( $\Delta F = 0.8$  for early and 2.2 for late peaks). **Figure**  
20 **5.B** shows the fitted source locations for subject-specific, early and late time-windows. The  
21 source localisations were within the cerebellum or the brainstem/cerebellar peduncle  
22 adjacent to the cerebellum. Table 1 shows the MNI coordinates and anatomical labels of each  
23 fit.

1 Dipole locations converged into the cerebellum even when using priors in the occipital lobe  
2 (model 5 & 6, see **Figure 5.C.**). We also undertook an additional Bayesian single dipole fit using  
3 an uninformative prior (initial location randomly sampled from a distribution centring at the  
4 middle point of the cerebellum with a 50-mm standard deviation; **Figure 5.D.**) and found  
5 similar results.

6 In order to locate the event-related power changes we used a beamformer with a covariance  
7 window covering a time range of -50 to +125 ms relative to air-puff onset, and a 5-80 Hz  
8 frequency band. We contrasted the power within this band between time windows of +75 to  
9 +125 ms and -50 to 0 ms relative to baseline (based on the observed sensor level power  
10 changes, **Figure 4**). We plotted each subject's global maximum location and the bootstrapped  
11 confidence volume in the MNI space in **Figure 6**. The locations were in the left (ipsilateral)  
12 cerebellum in all 3 subjects. The 95% confidence volumes based on 50 bootstraps were lower  
13 than the grid spacing (2 mm) for subject 1 and 2 and was 12.0 mm<sup>3</sup> for subject 3.

## A Model comparison

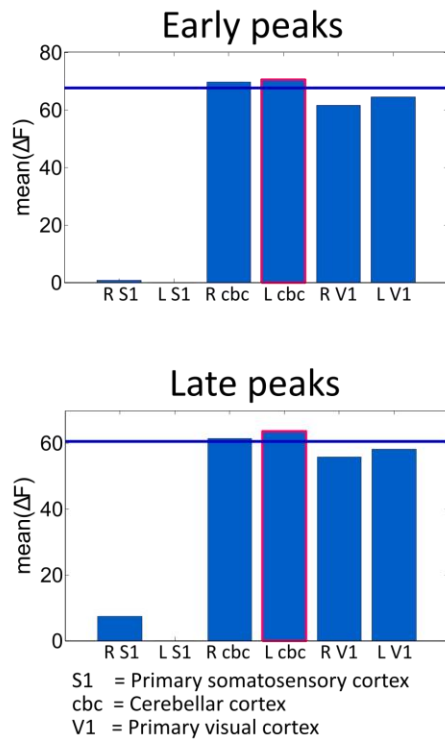

## B Best dipole fits

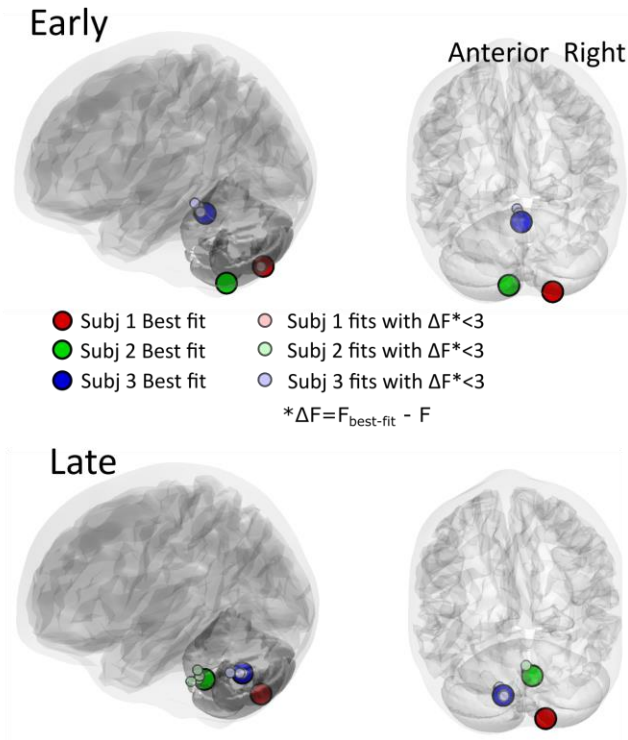

## C Dipole fits using occipital priors

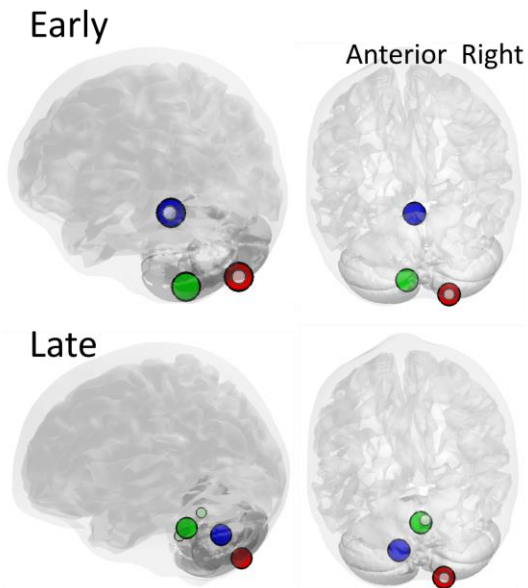

## D Dipole fits using uninformative priors

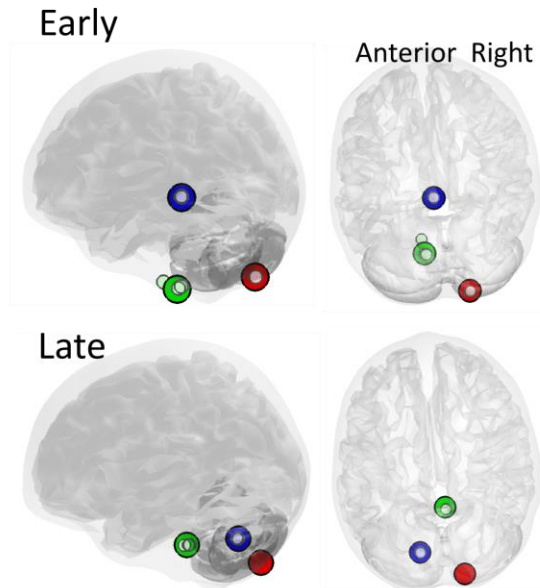

1

2 **Figure 5 Evoked response source localisation: Single dipole fits using subject-specific early**  
 3 **and late peaks of evoked responses. (A) Bayesian model comparison. Free energy ( $F$ ) is used**  
 4 **to approximate the model evidence of a given source solution. Bars represent the mean Free**  
 5 **energy value relative to the poorest model (which was Left S1 both early and late peaks). The**  
 6 **left (ipsilateral) cerebellum has the highest model evidence for both early and late peaks. It**  
 7 **should also be noted that both the left and right cerebellum are significantly better than the**

1 other priors ( $\Delta F > 3$ , blue line). **(B)** Single dipole fits for each participant. Large circles represent  
 2 the source locations of models with highest evidence for each individual. Smaller circles are  
 3 models which are suboptimal but not significantly so ( $\Delta F = F_{best-fit} - F < 3$ ). **(C)** Single dipole fits  
 4 for each peak and subject when using priors in either left or right occipital lobe **(D)** Single  
 5 dipole fits for each peak and subject using an effectively uninformative prior (in centre of  
 6 cerebellum with standard deviation 50 mm). As in **(B)**, large circles in both **(C)** and **(D)**  
 7 represent the best fits for each subjects and small circles represent fits which have  $\Delta F = F_{best-fit}$   
 8  $- F < 3$ . The Bayes' posterior estimates of source positions in **(C)** and **(D)** are largely in  
 9 agreement with the dipole fits using more carefully selected physiological priors in **(B)**.

10

|           |                       | Early           |        |       | Late            |       |        |        |
|-----------|-----------------------|-----------------|--------|-------|-----------------|-------|--------|--------|
| Location• |                       | MNI coordinates |        |       | MNI coordinates |       |        |        |
|           |                       | X               | Y      | Z     | Location        | X     | Y      | Z      |
| Subject 1 | R VIII                | 17.95           | -72.7  | -55   | R VIII          | 12.34 | -71.1  | -52.1  |
| Subject 2 | L IX                  | -7.71           | -55.3  | -61   | R pons          | 8.4   | -38.07 | -43.62 |
| Subject 3 | R cerebellar peduncle | 2.32            | -40.85 | -21.7 | L deep nucleus  | -14   | -64.63 | -35.2  |

11 **Table 1.** Location of dipole fits for early and late components of the evoked response in 3  
 12 subjects. Location labels were based on (Diedrichsen, Balsters, Flavell, Cussans, & Ramnani,  
 13 2009).

14

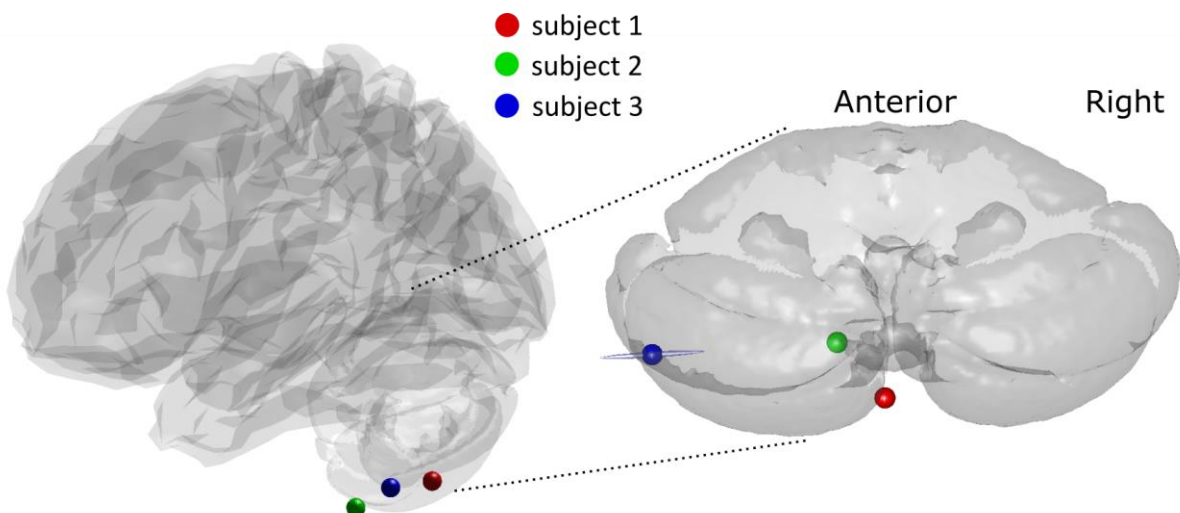

15

16 **Figure 6 Beamformer source localisation.** The source locations of subject specific global  
 17 maximal power change at the time window 75-125 ms are all in the left, i.e. ipsilateral,  
 18 cerebellum. The light-blue ellipsoid is the 95% confidence volume for Subject 3 estimated by



1 50 bootstraps. Confidence volumes for Subjects 1 & 2 are smaller than the 2 mm beamformer  
2 grid spacing.

### 3 **Discussion**

4 We have demonstrated that a small (less than 20 sensor) OPM array can detect cerebellar  
5 activity during unconditioned eyeblinks elicited by brief air puffs. The evoked responses had  
6 both early (~50 ms) and late components (~90-110 ms); spectrally we found a broad-band  
7 power change at ~100 ms. The source localisation for both evoked and event-related spectral  
8 change was generally consistent with previous neural recordings in animals and fMRI in  
9 humans (i.e. ipsilateral).

10 Evoked fields from the cerebellum used to be considered unattainable at the scalp level  
11 because low-amplitude cerebellar activity would be concealed by stronger adjacent  
12 neocortical activity. In the small number of published MEG studies, cerebellar activation to  
13 somatosensory stimuli has been identified by either using *a priori* assumptions of an  
14 equivalent current dipole (ECD) in the cerebellum (Tesche & Karhu, 1997; Tesche & Karhu,  
15 2000) or by using a beamforming source reconstruction (Hashimoto et al., 2003). The  
16 Hashimoto study (Hashimoto et al., 2003) showed a four-component response in the  
17 cerebellum following median nerve stimulation, and the authors made putative assignment  
18 of these peaks to different cerebellar inputs. The Hashimoto showed robust source level  
19 images (again lateralized stimuli predominantly localized to medial cerebellum) but based on  
20 10,000 trials. By contrast, our results are apparent at sensor level and are based on 550-580  
21 trials per participant. We anticipate that a further reduction in required trials could be  
22 achieved by bespoke design of a cerebellar scanner-cast, to optimise sensor locations and  
23 further increase SNR.

24 We were concerned about the contribution of artefacts from non-neural sources, especially  
25 the neck muscles and eye movements. The corneo-retinal dipole or extra-orbital muscle is not  
26 likely to be an issue, as this type of artefact has been shown to be highly focal and limited to  
27 fronto-central sensors (Carl, Aik, Knig, Engel, & Hipp, 2012; Muthukumaraswamy, 2013).  
28 Likewise, the air-puff induced eye-blink occurs relatively late (~100 ms) after stimulus onset  
29 (**Supplementary Figure 1**) making it an unlikely source of the early transients. For the same  
30 reason, we think it unlikely that the observed changes could be due to some reflexive  
31 head/neck muscle activity, as we would expect this to occur post-eyeblink (Valls-Sol et al.  
32 1999). For induced response, the significant, but only weak temporal correlation between the  
33 latencies of spectral power changes and blinks (explaining less than 4% of the variance in  
34 latency) suggested they were not blink-related artefacts either (**Supplementary Figure 2**).  
35 Further, we observed the same spectral profile (**Supplementary Figure 3**) at the source level  
36 (using an unregularized beamformer) which we would not have expected if the response were  
37 due to muscle artefact (Hipp & Siegel, 2013). However, it is important to note that while blink-  
38 related non-neural sources can generally be excluded, the cerebellum is known to be a key  
39 part of the blink-control circuit (Hesslow, 1994).



1 To our knowledge, this is the first MEG study to examine the neural response due to the  
2 unconditioned stimulus (US, i.e. air-puffs) of eyeblink conditioning. Being a model system for  
3 cerebellar learning, the neural circuits of both unconditioned and conditioned blink responses  
4 have been extensively investigated in animals. In untrained rodents, single-unit recording  
5 from Purkinje cells in ipsilateral cerebellar cortical lobule VI show that air-puffs elicit climbing  
6 fibre inputs, with high probability, peaking around 15-50 ms post-stimulus (Mostofi,  
7 Holtzman, Grout, Yeo, & Edgley, 2010; Ohmae & Medina, 2015). Importantly, excitation of  
8 the very powerful climbing fibre-Purkinje cell synapse, simultaneously activating the  
9 dendrites of a spatially aligned set of Purkinje cells has been considered to be the most  
10 probable source for a strong open field detected by MEG recordings (Tesche & Karhu, 1997).  
11 According to animal local field potential recording, the US reaches the cerebellum first via an  
12 early mossy fibre response and then the aforementioned climbing fibre response (Hesslow,  
13 1994; Mostofi et al., 2010). Our MEG evoked responses showed two peaks, the first tightly  
14 clustered around 50-60 ms while the second occurred 80-110 ms post-puff with significant  
15 inter-individual differences in latency. These first human data are thus broadly consistent with  
16 the animal literature. Previously, similar qualitative features including multiple components  
17 (Hashimoto et al., 2003; Tesche & Karhu, 2000) and inter-individual latency variability (Tesch  
& Karhu, 1997) responding to simple somatosensory input have also been found in human  
19 MEG at source levels.

20 We also report a broadband power increase ranging  $\sim 100$  ms following air-puff stimulation in  
21 all subjects, originating from the ipsilateral cerebellum. In the sparse number of MEG studies  
22 reporting cerebellar oscillatory changes, Tesche and colleagues discovered increases in the  
23 alpha and gamma range power in response to somatosensory stimulation administration and  
24 omission (Tesch & Karhu, 2000). For action execution and observation, decreased power in  
25 alpha and beta range was observed (Kennedy, Singh, & Muthukumaraswamy, 2011;  
26 Muthukumaraswamy et al., 2006).

27 The Bayesian inversion scheme found the left (ipsilateral) lobule VI was the best fitting single-  
28 dipole model of these evoked responses. For the induced response, the left cerebellum was  
29 also identified as the neuronal source by beamforming. The source locations are in agreement  
30 with previous findings (Cheng et al., 2008). However, it should be noted that in all three  
31 subjects, the best evoked-response fits located close to the midline, more medial than lobule  
32 VI. Besides, for both early and late peaks of the evoked field, the differences of Free energy  
33 values between the right and left cerebellum lobule VI were small ( $\Delta F < 3$ , **Figure 5.A**). One  
34 potential cause of this finding is that although ipsilateral lobule VI is the dominant neuronal  
35 source of the US signal, concurrent (but weaker) neuronal activation has been found in the  
36 contralateral lobule VI in both human fMRI (Dimitrova et al., 2002; Thurling et al., 2015) and  
37 in animal studies (Mostofi et al., 2010). When fitting evoked fields with two-dipole priors, the  
38 majority of best fits were indeed paired bilateral cerebellar sources (see **Supplementary**  
39 **Figure 4**). These results support the hypothesis of bilateral activation in the cerebellum by  
40 unilateral air-puff stimulation. This said, we admit the current results cannot conclusively

1 locate the sources at a resolution of cerebellar lobules (Schmahmann et al., 1999). To give  
2 confidence in the identities and localisations of our findings, we intend to extend the studies  
3 to include classical conditioning and extinction of the eye-blink, and to track the predicted  
4 changes in the responses to the unconditioned and conditioned stimuli.

5 The current sensor layout is limited by the number of OPM sensors available. Given the  
6 relatively greater depth of the cerebellum, its complex architecture, and the diffuse spatial  
7 signature seen in the evoked responses (see the fieldmaps in the **Figure 3.A.**, lower panel),  
8 the source localisation would likely benefit from a denser and spatially extended sensor  
9 coverage. Additionally, it would be useful to design scanner-casts allowing sensor placed over  
10 the upper neck to provide a necessary scope on the inferior cerebellum, which was less  
11 sufficiently covered by the current set-up (see **Figure 2.A.**).

## 12 **Conclusion**

13 We have demonstrated an OPM-MEG system that can be used to study the electrophysiology  
14 of the human cerebellum. The similarities between human MEG and animal field potential  
15 data in this proof-of-principle task offers promise for future studies to advance our  
16 understanding of cerebellar function through non-invasive electrophysiology in humans.  
17 Possessing sufficient signal detectability and being wearable and potentially moveable, we  
18 expect OPM-MEG systems to be a powerful tool in the investigation of cerebellar functions in  
19 both motor and cognitive tasks (Boto et al., 2018; Sokolov et al., 2017; Tierney et al., 2018).  
20 This OPM-MEG system also has the capacity to fill the “white regions” (Niedermeyer, 2004;  
21 Schomer & Lopes da Silva, 2010) of the map of clinical electrophysiology in the cerebellum,  
22 with impacts on diseases including movement disorders (Bostan & Strick, 2018), mental  
23 disorders (Romer et al., 2017), dementia (Fyfe, 2016), to name a few.

## 24 **Acknowledgements**

25 CL is funded by a BBSRC research grant (BB/M009645/1). This work was supported by a  
26 Wellcome collaborative award to GRB, MJB and RB (203257/Z/16/Z, 203257/B/16/Z). The  
27 WCHN is supported by a strategic award from Wellcome (091593/Z/10/Z). RCM is funded by  
28 a Royal Society Leverhulme Senior Fellowship and by Wellcome grant WT212422. We thank  
29 Uta Noppeney for use of the pneumatic controller to deliver air-puffs and Jose David Lopez  
30 for helpful discussion.

## References:

- Bostan, A. C., & Strick, P. L. (2018). The basal ganglia and the cerebellum: Nodes in an integrated network. *Nature Reviews Neuroscience*, *19*(6), 338–350. <https://doi.org/10.1038/s41583-018-0002-7>
- Boto, E., Holmes, N., Leggett, J., Roberts, G., Shah, V., Meyer, S. S., ... Brookes, M. J. (2018). Moving magnetoencephalography towards real-world applications with a wearable system. *Nature*, *555*(7698), 657–661. <https://doi.org/10.1038/nature26147>
- Boto, E., Meyer, S. S., Shah, V., Alem, O., Knappe, S., Kruger, P., ... Brookes, M. J. (2017). A new generation of magnetoencephalography: Room temperature measurements using optically-pumped magnetometers. *NeuroImage*, *149*(January), 404–414. <https://doi.org/10.1016/j.neuroimage.2017.01.034>
- Buckner, R. L. (2013). The cerebellum and cognitive function: 25 years of insight from anatomy and neuroimaging. *Neuron*, *80*(3), 807–815. <https://doi.org/10.1016/j.neuron.2013.10.044>
- Carl, C., Açık, A., König, P., Engel, A. K., & Hipp, J. F. (2012). The saccadic spike artifact in MEG. *NeuroImage*, *59*(2), 1657–1667. <https://doi.org/10.1016/j.neuroimage.2011.09.020>
- Cheng, D. T., Disterhoft, J. F., Power, J. M., Ellis, D. A., & Desmond, J. E. (2008). Neural substrates underlying human delay and trace eyeblink conditioning. *Proceedings of the National Academy of Sciences*, *105*(23), 8108–8113. <https://doi.org/10.1073/pnas.0800374105>
- Dalal, S. S., Osipova, D., Bertrand, O., & Jerbi, K. (2013). Oscillatory activity of the human cerebellum: The intracranial electrocerebellogram revisited. *Neuroscience and Biobehavioral Reviews*, *37*(4), 585–593. <https://doi.org/10.1016/j.neubiorev.2013.02.006>
- Diedrichsen, J., Balsters, J. H., Flavell, J., Cussans, E., & Ramnani, N. (2009). A probabilistic MR atlas of the human cerebellum. *NeuroImage*, *46*(1), 39–46. <https://doi.org/10.1016/j.neuroimage.2009.01.045>
- Dimitrova, A., Weber, J., Maschke, M., Elles, H. G., Kolb, F. P., Forsting, M., ... Timmann, D. (2002). Eyeblink-related areas in human cerebellum as shown by fMRI. *Human Brain Mapping*, *17*(2), 100–115. <https://doi.org/10.1002/hbm.10056>
- Dupont-Roc, J., Haroche, S., & Cohen-Tannoudji, C. (1969). Detection of very weak magnetic fields (10–9gauss) by  $^{87}\text{Rb}$  zero-field level crossing resonances. *Physics Letters A*, *28*(9), 638–639. [https://doi.org/10.1016/0375-9601\(69\)90480-0](https://doi.org/10.1016/0375-9601(69)90480-0)
- Freeman, J. H., & Steinmetz, A. B. (2011). Neural circuitry and plasticity mechanisms underlying delay eyeblink conditioning. *Learning & Memory*, *18*(10), 666–677. <https://doi.org/10.1101/lm.2023011>
- Friston, K., Mattout, J., Trujillo-Barreto, N., Ashburner, J., & Penny, W. (2007). Variational free energy and the Laplace approximation. *NeuroImage*, *34*(1), 220–234. <https://doi.org/10.1016/j.neuroimage.2006.08.035>

- Fyfe, I. (2016). Dementia: Cerebellar atrophy has disease-specific patterns. *Nature Reviews Neurology*, *12*(4), 188. <https://doi.org/10.1038/nrneurol.2016.28>
- Gerloff, C., Altenmüller, E., & Dichgans, J. (1996). Disintegration and reorganization of cortical motor processing in two patients with cerebellar stroke. *Electroencephalography and Clinical Neurophysiology*, *98*(1), 59–68. [https://doi.org/10.1016/0013-4694\(95\)00204-9](https://doi.org/10.1016/0013-4694(95)00204-9)
- Glickstein, M., Sultan, F., & Voogd, J. (2011). Functional localization in the cerebellum. *Cortex*, *47*(1), 59–80. <https://doi.org/10.1016/j.cortex.2009.09.001>
- Gross, J., Timmermann, L., Kujala, J., Dirks, M., Schmitz, F., Salmelin, R., & Schnitzler, A. (2002). The neural basis of intermittent motor control in humans. *Proceedings of the National Academy of Sciences of the United States of America*, *99*(4), 2299–2302. <https://doi.org/10.1073/pnas.032682099>
- Hashimoto, I., Kimura, T., Tanosaki, M., Iguchi, Y., & Sekihara, K. (2003). Muscle afferent inputs from the hand activate human cerebellum sequentially through parallel and climbing fiber systems. *Clinical Neurophysiology*, *114*(11), 2107–2117. [https://doi.org/10.1016/S1388-2457\(03\)00233-5](https://doi.org/10.1016/S1388-2457(03)00233-5)
- Hesslow, G. (1994). Correspondence between climbing fibre input and motor output in eyeblink related areas in cat cerebellar cortex. *The Journal of Physiology*, *476*(2), 229–244. <https://doi.org/10.1113/jphysiol.1994.sp020126>
- Holmes, N., Leggett, J., Boto, E., Roberts, G., Hill, R. M., Tierney, T. M., ... Bowtell, R. (2018). A bi-planar coil system for nulling background magnetic fields in scalp mounted magnetoencephalography. *NeuroImage*. <https://doi.org/10.1016/j.neuroimage.2018.07.028>
- Jerbi, K., Lachaux, J.-P., N'Diaye, K., Pantazis, D., Leahy, R. M., Garnero, L., & Baillet, S. (2007). Coherent neural representation of hand speed in humans revealed by MEG imaging. *Proceedings of the National Academy of Sciences*, *104*(18), 7676–7681. <https://doi.org/10.1073/pnas.0609632104>
- Kennedy, J. S., Singh, K. D., & Muthukumaraswamy, S. D. (2011). An MEG investigation of the neural mechanisms subserving complex visuomotor coordination. *International Journal of Psychophysiology*, *79*(2), 296–304. <https://doi.org/10.1016/j.ijpsycho.2010.11.003>
- Kiebel, S. J., Daunizeau, J., Phillips, C., & Friston, K. J. (2008). Variational Bayesian inversion of the equivalent current dipole model in EEG/MEG. *NeuroImage*, *39*(2), 728–741. <https://doi.org/10.1016/j.neuroimage.2007.09.005>
- Kirsch, P., Achenbach, C., Kirsch, M., Heinzmann, M., Schienle, A., & Vaitl, D. (2003). Cerebellar and hippocampal activation during eyeblink conditioning depends on the experimental paradigm: A MEG Study. *Neural Plasticity*, *10*(4), 291–301. <https://doi.org/10.1155/NP.2003.291>
- Lascano, A. M., Lemkaddem, A., Granziera, C., Korff, C. M., Boex, C., Jenny, B., ... Vulliemoz, S. (2013). Tracking the source of cerebellar epilepsy: Hemifacial seizures associated with cerebellar cortical dysplasia. *Epilepsy Research*, *105*(1–2), 245–249.

<https://doi.org/10.1016/j.eplepsyres.2012.12.010>

- Leonardelli, E., Braun, C., Weisz, N., Lithari, C., Occelli, V., & Zampini, M. (2015). Prestimulus oscillatory alpha power and connectivity patterns predispose perceptual integration of an audio and a tactile stimulus. *Human Brain Mapping, 36*(9), 3486–3498. <https://doi.org/10.1002/hbm.22857>
- Leys, C., Ley, C., Klein, O., Bernard, P., & Licata, L. (2013). Detecting outliers: Do not use standard deviation around the mean, use absolute deviation around the median. *Journal of Experimental Social Psychology, 49*(4), 764–766. <https://doi.org/10.1016/j.jesp.2013.03.013>
- Meyer, S. S., Bonaiuto, J., Lim, M., Rossiter, H., Waters, S., Bradbury, D., ... Barnes, G. R. (2017). Flexible head-casts for high spatial precision MEG. *Journal of Neuroscience Methods, 276*, 38–45. <https://doi.org/10.1016/j.jneumeth.2016.11.009>
- Mostofi, A., Holtzman, T., Grout, A. S., Yeo, C. H., & Edgley, S. A. (2010). Electrophysiological Localization of Eyeblink-Related Microzones in Rabbit Cerebellar Cortex. *Journal of Neuroscience, 30*(26), 8920–8934. <https://doi.org/10.1523/JNEUROSCI.6117-09.2010>
- Muthukumaraswamy, S. D. (2013). High-frequency brain activity and muscle artifacts in MEG/EEG: a review and recommendations. *Frontiers in Human Neuroscience, 7*(April), 1–11. <https://doi.org/10.3389/fnhum.2013.00138>
- Muthukumaraswamy, S. D., Johnson, B. W., Gaetz, W. C., & Cheyne, D. O. (2006). Neural processing of observed oro-facial movements reflects multiple action encoding strategies in the human brain. *Brain Research, 1071*(1), 105–112. <https://doi.org/10.1016/j.brainres.2005.11.053>
- Muthukumaraswamy, S. D., Johnson, B. W., & Hamm, J. P. (2003). A high density ERP comparison of mental rotation and mental size transformation. *Brain and Cognition, 52*(2), 271–280. [https://doi.org/10.1016/S0278-2626\(03\)00077-0](https://doi.org/10.1016/S0278-2626(03)00077-0)
- Nevalainen, P., Ramstad, R., Isotalo, E., Haapanen, M. L., & Lauronen, L. (2006). Trigeminal somatosensory evoked magnetic fields to tactile stimulation. *Clinical Neurophysiology, 117*(9), 2007–2015. <https://doi.org/10.1016/j.clinph.2006.05.019>
- Niedermeyer, E. (2004). The electrocerebellogram. *Clinical EEG and Neuroscience : Official Journal of the EEG and Clinical Neuroscience Society (ENCS), 35*(2), 112–115.
- Nolte, G. (2003). The magnetic lead field theorem in the quasi-static approximation and its use for magnetoencephalography forward calculation in realistic volume conductors. *Physics in Medicine and Biology, 48*(22), 3637–3652. <https://doi.org/10.1088/0031-9155/48/22/002>
- Ohmae, S., & Medina, J. F. (2015). Climbing fibers encode a temporal-difference prediction error during cerebellar learning in mice. *Nature Neuroscience, 18*(12), 1798–1803. <https://doi.org/10.1038/nn.4167>
- Pollok, B., Gross, J., Dirks, M., Timmermann, L., & Schnitzler, A. (2004). The cerebral oscillatory network of voluntary tremor. *Journal of Physiology, 554*(3), 871–878. <https://doi.org/10.1113/jphysiol.2003.051235>

- Pollok, B., Gross, J., Müller, K., Aschersleben, G., & Schnitzler, A. (2005). The cerebral oscillatory network associated with auditorily paced finger movements. *NeuroImage*, 24(3), 646–655. <https://doi.org/10.1016/j.neuroimage.2004.10.009>
- Romer, A. L., Knodt, A. R., Houts, R., Brigidi, B. D., Moffitt, T. E., Caspi, A., & Hariri, A. R. (2017). Structural alterations within cerebellar circuitry are associated with general liability for common mental disorders. *Molecular Psychiatry*, (February 2017), 1084–1090. <https://doi.org/10.1038/mp.2017.57>
- Schmahmann, J. D., Doyon, J., McDonald, D., Holmes, C., Lavoie, K., Hurwitz, A., ... Petrides, M. (1999). Three-dimensional MRI atlas of the human cerebellum in proportional stereotaxic space. *NeuroImage*, 10(3 1), 233–260. <https://doi.org/10.1006/nimg.1999.0459>
- Schmahmann, J. D., & Sherman, J. C. (1998). The cerebellar cognitive affective syndrome. *Brain*, 121(4), 561–579. <https://doi.org/10.1093/brain/121.4.561>
- Schnitzler, A., Münks, C., Butz, M., Timmermann, L., & Gross, J. (2009). Synchronized brain network associated with essential tremor as revealed by magnetoencephalography. *Movement Disorders*, 24(11), 1629–1635. <https://doi.org/10.1002/mds.22633>
- Schomer, D. L., & Lopes da Silva, F. H. (2010). *Electroencephalography. Basic principles, clinical applications, and related fields* (6th ed.). Lippincott Williams & Wilkins, Philadelphia, PA, USA.
- Shah, V. K., & Wakai, R. T. (2013). A compact, high performance atomic magnetometer for biomedical applications. *Physics in Medicine and Biology*, 58(22), 8153–8161. <https://doi.org/10.1088/0031-9155/58/22/8153>
- Shah, V., Osborne, J., Orton, J., & Alem, O. (2018). Fully integrated, standalone zero field optically pumped magnetometer for biomagnetism. *Steep Dispersion Engineering and Opto-Atomic Precision Metrology XI*, (February), 51. <https://doi.org/10.1117/12.2299197>
- Sokolov, A. A., Miall, R. C., & Ivry, R. B. (2017). The Cerebellum: Adaptive Prediction for Movement and Cognition. *Trends in Cognitive Sciences*, 21(5), 313–332. <https://doi.org/10.1016/j.tics.2017.02.005>
- Stoodley, C. J., & Schmahmann, J. D. (2009). Functional topography in the human cerebellum: A meta-analysis of neuroimaging studies. *NeuroImage*, 44(2), 489–501. <https://doi.org/10.1016/j.neuroimage.2008.08.039>
- Tallon-Baudry, C., Bertrand, O., Peronnet, F., & Pernier, J. (1998). Induced gamma-band activity during the delay of a visual short-term memory task in humans. *The Journal of Neuroscience : The Official Journal of the Society for Neuroscience*, 18(11), 4244–4254. <https://doi.org/20026318>
- Tass, P. A., Fieseler, T., Dammers, J., Dolan, K., Morosan, P., Majtanik, M., ... Fink, G. R. (2003). Synchronization Tomography: A Method for Three-Dimensional Localization of Phase Synchronized Neuronal Populations in the Human Brain using Magnetoencephalography. *Physical Review Letters*, 90(8), 4. <https://doi.org/10.1103/PhysRevLett.90.088101>



- Tesche, C. D., & Karhu, J. (1997). Somatosensory evoked magnetic fields arising from sources in the human cerebellum. *Brain Research*, 744(1), 23–31. [https://doi.org/10.1016/S0006-8993\(96\)01027-X](https://doi.org/10.1016/S0006-8993(96)01027-X)
- Tesche, C. D., & Karhu, J. J. T. (2000). Anticipatory cerebellar responses during somatosensory omission in man. *Human Brain Mapping*, 9(3), 119–142. [https://doi.org/10.1002/\(SICI\)1097-0193\(200003\)9:3<119::AID-HBM2>3.0.CO;2-R](https://doi.org/10.1002/(SICI)1097-0193(200003)9:3<119::AID-HBM2>3.0.CO;2-R)
- Thurling, M., Kahl, F., Maderwald, S., Stefanescu, R. M., Schlamann, M., Boele, H.-J., ... Timmann, D. (2015). Cerebellar Cortex and Cerebellar Nuclei Are Concomitantly Activated during Eyeblink Conditioning: A 7T fMRI Study in Humans. *Journal of Neuroscience*, 35(3), 1228–1239. <https://doi.org/10.1523/JNEUROSCI.2492-14.2015>
- Tierney, T. M., Holmes, N., Meyer, S. S., Boto, E., Roberts, G., Leggett, J., ... Barnes, G. R. (2018). Cognitive neuroscience using wearable magnetometer arrays: Non-invasive assessment of language function. *NeuroImage*, *In press*. <https://doi.org/10.1016/j.neuroimage.2018.07.035>
- Timmermann, L., Gross, J., Dirks, M., Volkmann, J., Freund, H. J., & Schnitzler, A. (2003). The cerebral oscillatory network of parkinsonian resting tremor. *Brain*, 126(1), 199–212. <https://doi.org/10.1093/brain/awg022>
- Todd, N. P. M., Govender, S., & Colebatch, J. G. (2018). The human electrocerebellogram (ECeG) recorded non-invasively using scalp electrodes. *Neuroscience Letters*, 682(May), 124–131. <https://doi.org/10.1016/j.neulet.2018.06.012>
- Valls-Solé, J., Valldeoriola, F., Molinuevo, J. L., Cossu, G., & Nobbe, F. (1999). Prepulse modulation of the startle reaction and the blink reflex in normal human subjects. *Experimental Brain Research*, 129(1), 49–56. <https://doi.org/10.1007/s002210050935>
- Yuval-Greenberg, S., Tomer, O., Keren, A. S., Nelken, I., & Deouell, L. Y. (2008). Transient Induced Gamma-Band Response in EEG as a Manifestation of Miniature Saccades. *Neuron*, 58(3), 429–441. <https://doi.org/10.1016/j.neuron.2008.03.027>
